# Supplementary material
Source: PubMed Central journal article supplement (PMC4146624)
Supplement: NIHMS612198-supplement-Supplemental_appendix.pdf [file NIHMS612198-supplement-Supplemental_appendix.pdf]

## **SUPPLEMENTAL MATERIAL**

### **P-Wave Morphology and the Risk of Incident Ischemic Stroke in the Multi-Ethnic Study of Atherosclerosis**

Hooman Kamel, MD; Elsayed Z. Soliman, MD, MS; Susan R. Heckbert, MD, PhD; Richard A. Kronmal, PhD; W. T. Longstreth, Jr., MD, MPH; Saman Nazarian, MD, PhD; Peter M. Okin, MD

#### **Supplemental Appendix**

##### *Table of Contents*

|                         |        |
|-------------------------|--------|
| Supplemental Methods    | Page 1 |
| Supplemental Results    | Page 3 |
| Supplemental Table      | Page 4 |
| Supplemental References | Page 5 |

## Supplemental Methods

### *Covariate Definitions*

Left ventricular hypertrophy was defined using a standard validated threshold for the Cornell voltage-duration product.<sup>1</sup> Hypertension was defined using Joint National Commission VI guidelines.<sup>2</sup> Diabetes status was based on the American Diabetes Association's 2003 fasting criteria.<sup>3</sup> A glomerular filtration rate  $<60$  ml/min/1.73 m<sup>2</sup> was considered chronic kidney disease.<sup>4</sup> Body mass index was categorized into four categories using thresholds of 25, 30, and 40 kg/m<sup>2</sup>.

### *Ascertainment of Atrial Fibrillation*

First, we ascertained AF using the 12-lead ECG done at the final study visit. Second, we recorded all diagnoses of AF identified during the course of endpoint investigation and adjudication. All hospitalizations during study follow-up were investigated, and medical records were reviewed for a predefined list of *International Classification of Diseases, 9<sup>th</sup> Revision, Clinical Modification (ICD-9-CM)* codes, including codes 427.3x for AF, which was documented in study records even if a study endpoint had not occurred. Similarly, all outpatient events representing possible primary study endpoints were investigated using medical record review and physician questionnaires, and diagnoses of AF associated with these events were recorded. Third, among participants enrolled in Medicare, we searched linked administrative data to identify any inpatient or outpatient claims for AF (*ICD-9-CM* codes 427.3x). In a sensitivity analysis, we also included self-reports of AF to maximize our sensitivity for this important covariate.

### *Statistical Analyses*

After visually inspecting their distributions, we used means with standard deviations (SD) and t-tests to compare P-wave predictor variables in participants with and without stroke. Among the 4,236 participants with available follow-up ECG data, we compared P-wave measurements at baseline and 5-year follow-up.

All models controlled for AF as a time-varying covariate. Additionally, we included age, sex, race, and any of the above baseline covariates that were significantly associated with incident stroke in univariate analyses at a threshold of  $P < 0.20$ ; sensitivity analyses that forced all baseline covariates into the models did not appreciably change our results. We verified the proportional hazards assumption by checking an interaction term between P-wave predictor variables and time.

In post hoc analyses, we additionally included systolic blood pressure, antihypertensive medication use, and the PR interval on ECG, as these variables are part of the Framingham risk score for AF;<sup>5</sup> prevalent heart failure was not included because MESA participants were free of vascular disease at baseline, and the presence of a heart murmur was not included because this information was not available. Furthermore, to assess whether P-wave measurements have incremental value for stroke prediction in addition to established risk scores, we calculated the

Framingham stroke risk score<sup>6</sup> and determined changes in the c-statistic and the net reclassification improvement (using standard risk categories of 5%, 10%, and 20%<sup>7</sup>) after including PTFV<sub>1</sub> in 1-SD increments.

### *Sensitivity Analyses*

We performed the Sobel-Goodman mediation test to determine the degree to which AF mediated any associations between P-wave morphology and stroke. This statistical test uses multivariable methods to isolate the pathways between a predictor, a potential mediator, and an outcome; it is considered the gold standard when formally testing the significance of a proposed mediation pathway.<sup>8</sup> We further assessed the independence of any associations between P-wave morphology and stroke by performing subgroup analyses limited to participants without any AF diagnoses throughout the study period. Since clinically apparent AF often manifests after a prolonged period of subclinical AF,<sup>9</sup> we performed sensitivity analyses in which AF diagnoses at any time during the entire study period was assumed to have been present from baseline. To ensure that we did not miss cases of AF, we repeated these sensitivity analyses in participants  $\geq 65$  years of age at baseline and enrolled in Medicare throughout the study period, which ensured AF ascertainment via linked Medicare claims data during the entire duration of follow-up. Lastly, to ensure further that subclinical AF would have had time to manifest, we repeated these Medicare-only subset analyses excluding participants who had a stroke during the 2 years before final follow-up.

To ensure further that associations between our P-wave predictors and stroke were not mediated by non-atrial vascular disease, we performed post hoc sensitivity analyses controlling for carotid intima media thickness and degree of carotid stenosis on ultrasound.

Lastly, we also used our baseline models to examine the associations between P-wave predictor variables and the risk of myocardial infarction (MI) and all-cause mortality. Since we hypothesized that P-wave morphology specifically reflects an atrial cardiomyopathy that causes cardiac embolism, rather than simply reflecting general cardiovascular risk, we expected to find a stronger association with stroke than with MI or death.

## Supplemental Results

Among participants with ECG data at 5-year follow-up, PTFV<sub>1</sub> increased by a mean 13.9%, and remained stable or increased in 3,093 participants (67.7%) while regressing in 1,475 participants (32.3%).

The Sobel-Goodman test indicated that AF mediated only 11% of the association between PTFV<sub>1</sub> and stroke. We found the same association between PTFV<sub>1</sub> and stroke in participants free of any AF diagnoses throughout the study (HR per 1-SD, 1.25; 95% CI, 1.02-1.52). In models adjusting for incident AF, our findings were unchanged when we modeled incident AF as having been present from baseline (HR per 1-SD, 1.20; 95% CI, 1.02-1.43), even when including self-reports of AF (HR per 1-SD, 1.21; 95% CI, 1.02-1.43). We found a significant association when limiting this analysis to participants  $\geq 65$  years of age at baseline and enrolled in Medicare throughout the study period (HR per 1-SD, 1.31; 95% CI, 1.04-1.66), even for stroke occurring at least 2 years before final follow-up (HR per 1-SD, 1.45; 95% CI, 1.09-1.91).

We found no significant association between baseline PTFV<sub>1</sub> and subsequent MI (HR per 1-SD, 1.06; 95% CI, 0.93-1.20) or death (HR per 1-SD, 1.05; 95% CI, 0.96-1.14). The associations between PTFV<sub>1</sub> and stroke were not materially changed in sensitivity analyses controlling for ultrasound measurements of carotid plaque (HR per 1-SD, 1.20; 95% CI, 1.01-1.43).

The inclusion of additional covariates from the Framingham AF risk score did not change the association between PTFV<sub>1</sub> and stroke (HR per 1-SD, 1.22; 95% CI, 1.03-1.45).

The c-statistic of the Framingham stroke risk score (0.76; 95% CI, 0.72-0.79) did not appreciably change after adding PTFV<sub>1</sub> (0.76; 95% CI, 0.72-0.80), but the addition of PTFV<sub>1</sub> led to a significant net reclassification improvement (0.113,  $P < 0.001$ ).

**Supplemental Table I.** Baseline P-Wave Measurements, Stratified by the Occurrence of Incident Ischemic Stroke

| <b>Characteristic</b>                                                  | <b>Stroke<br/>(N = 121)</b> | <b>No Stroke<br/>(N = 6,620)</b> | <b>P value</b> |
|------------------------------------------------------------------------|-----------------------------|----------------------------------|----------------|
| <b>P-wave terminal force in lead V<sub>1</sub> (PTFV<sub>1</sub>):</b> |                             |                                  |                |
| Mean (SD), $\mu\text{V}^*\text{ms}$                                    | 2,860 (1,996)               | 2,171 (1,786)                    | <.001          |
| $\geq 95^{\text{th}}$ percentile, N (%)                                | 14 (11.6)                   | 324 (4.9)                        | .001           |
| <b>P-wave mean area:</b>                                               |                             |                                  |                |
| Mean (SD), $\mu\text{V}^*\text{ms}$                                    | 3,702 (1,020)               | 3,554 (953)                      | .09            |
| $\geq 95^{\text{th}}$ percentile, N (%)                                | 11 (9.1)                    | 325 (4.9)                        | .04            |
| <b>P-wave maximum area:</b>                                            |                             |                                  |                |
| Mean (SD), $\mu\text{V}^*\text{ms}$                                    | 6,689 (2,507)               | 6,364 (2,100)                    | .09            |
| $\geq 95^{\text{th}}$ percentile, N (%)                                | 8 (6.6)                     | 330 (5.0)                        | .42            |
| <b>P-wave mean duration:</b>                                           |                             |                                  |                |
| Mean (SD), ms                                                          | 107.0 (13.0)                | 103.4 (13.1)                     | .003           |
| $\geq 95^{\text{th}}$ percentile, N (%)                                | 13 (10.7)                   | 390 (5.9)                        | .03            |
| <b>P-wave maximum duration:</b>                                        |                             |                                  |                |
| Mean (SD), ms                                                          | 109.8 (13.3)                | 106.0 (12.7)                     | .001           |
| $\geq 95^{\text{th}}$ percentile, N (%)                                | 15 (12.4)                   | 411 (6.2)                        | .006           |

Abbreviations: SD, standard deviation.

## Supplemental References

1. Okin PM, Wachtell K, Devereux RB, Harris KE, Jern S, Kjeldsen SE, et al. Regression of electrocardiographic left ventricular hypertrophy and decreased incidence of new-onset atrial fibrillation in patients with hypertension. *JAMA*. 2006;296:1242-1248.
2. Members of the Joint National Committee on Prevention, Detection, Evaluation, and Treatment of High Blood Pressure. The sixth report of the Joint National Committee on prevention, detection, evaluation, and treatment of high blood pressure. *Arch Intern Med*. 1997;157:2413-2446.
3. Genuth S, Alberti KG, Bennett P, Buse J, Defronzo R, Kahn R, et al. Follow-up report on the diagnosis of diabetes mellitus. *Diabetes Care*. 2003;26:3160-3167.
4. K/DOQI Work Group on Chronic Kidney Disease. K/DOQI clinical practice guidelines for chronic kidney disease: evaluation, classification, and stratification. *Am J Kidney Dis*. 2002;39:S1-266.
5. Schnabel RB, Sullivan LM, Levy D, Pencina MJ, Massaro JM, D'Agostino RB, Sr., et al. Development of a risk score for atrial fibrillation (Framingham Heart Study): a community-based cohort study. *Lancet*. 2009;373:739-745.
6. D'Agostino RB, Wolf PA, Belanger AJ, Kannel WB. Stroke risk profile: adjustment for antihypertensive medication. The Framingham Study. *Stroke*. 1994;25:40-43.
7. Ito H, Pacold IV, Durazo-Arvizu R, Liu K, Shilipak MG, Goff DC, Jr., et al. The effect of including cystatin C or creatinine in a cardiovascular risk model for asymptomatic individuals: the multi-ethnic study of atherosclerosis. *Am J Epidemiol*. 2011;174:949-957.
8. De Neve JE, Oswald AJ. Estimating the influence of life satisfaction and positive affect on later income using sibling fixed effects. *Proc Natl Acad Sci U S A*. 2012;109:19953-19958.
9. Healey JS, Connolly SJ, Gold MR, Israel CW, Van Gelder IC, Capucci A, et al. Subclinical atrial fibrillation and the risk of stroke. *N Engl J Med*. 2012;366:120-129.
